# Supplementary material for: A novel gel polymer electrolyte doped with MXene enables dendrite-free cycling for high-performance sodium metal batteries
Source: Royal Society of Chemistry journal article supplement (doi:10.1039/d2ta00452f), 2022-01-01
Supplement: d2ta00452f1.pdf [file d2ta00452f1.pdf]

## Supporting Information

### A novel gel-polymer electrolyte doped with MXene enabling dendrite-free cycling for high performance sodium metal batteries

*Yixin Zhang,<sup>a</sup> Feng Wu,<sup>a</sup> Yongxin Huang,<sup>a</sup> Shuaijie Li,<sup>a</sup> Cheng Li,<sup>a</sup> Ziheng Wang,<sup>a</sup>  
Man Xie<sup>\*a</sup>*

Table S1. Formula and ionic conductivity for different samples

| Sample                   | PVDF-HFP/g | PEG-4000/g | MXene/g | ionic conductivity/10 <sup>-4</sup> |
|--------------------------|------------|------------|---------|-------------------------------------|
| 0%PEG-PVDF-HFP           | 2.0        | 0          | 0       | 1.15                                |
| 10%PEG-PVDF-HFP          | 2.0        | 0.2        | 0       | 1.90                                |
| 20%PEG-PVDF-HFP          | 2.0        | 0.4        | 0       | 2.06                                |
| 30%PEG-PVDF-HFP          | 2.0        | 0.6        | 0       | 7.51                                |
| 40%PEG-PVDF-HFP          | 2.0        | 0.8        | 0       | 8.82                                |
| 50%PEG-PVDF-HFP          | 2.0        | 1.0        | 0       | 11.71                               |
| 60%PEG-PVDF-HFP          | 2.0        | 1.2        | 0       | 9.48                                |
| 2%MXene-50%PEG-PVDF-HFP  | 2.0        | 1.0        | 0.04    | 11.84                               |
| 4%MXene-50%PEG-PVDF-HFP  | 2.0        | 1.0        | 0.08    | 12.22                               |
| 6%MXene-50%PEG-PVDF-HFP  | 2.0        | 1.0        | 0.12    | 14.88                               |
| 8%MXene-50%PEG-PVDF-HFP  | 2.0        | 1.0        | 0.16    | 17.56                               |
| 10%MXene-50%PEG-PVDF-HFP | 2.0        | 1.0        | 0.20    | 15.27                               |

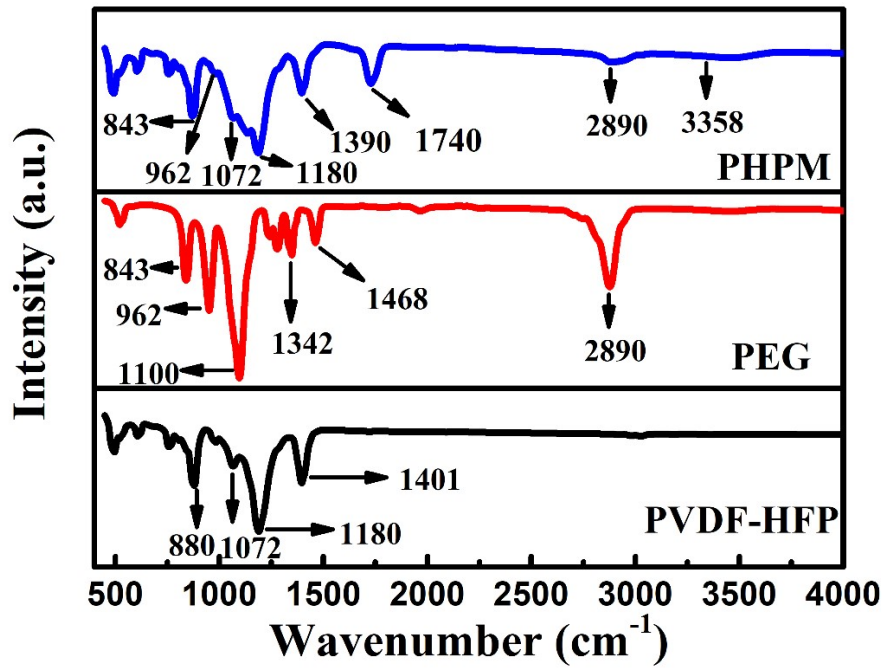

Figure S1. Infrared spectrum images of PVDF-HFP, PHP and PHPM membranes.

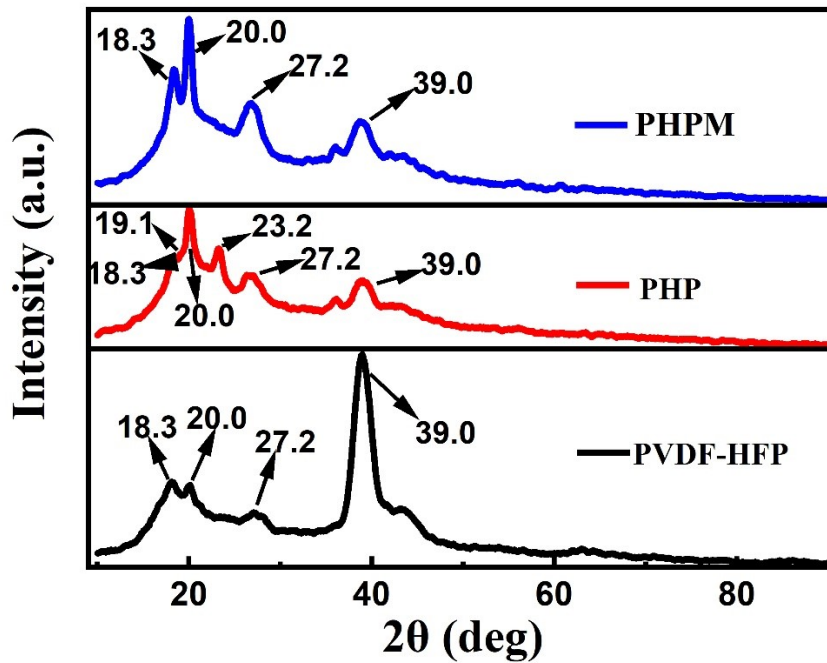

Figure S2. X-Ray Diffraction of PVDF-HFP, PHP and PHPM membranes.

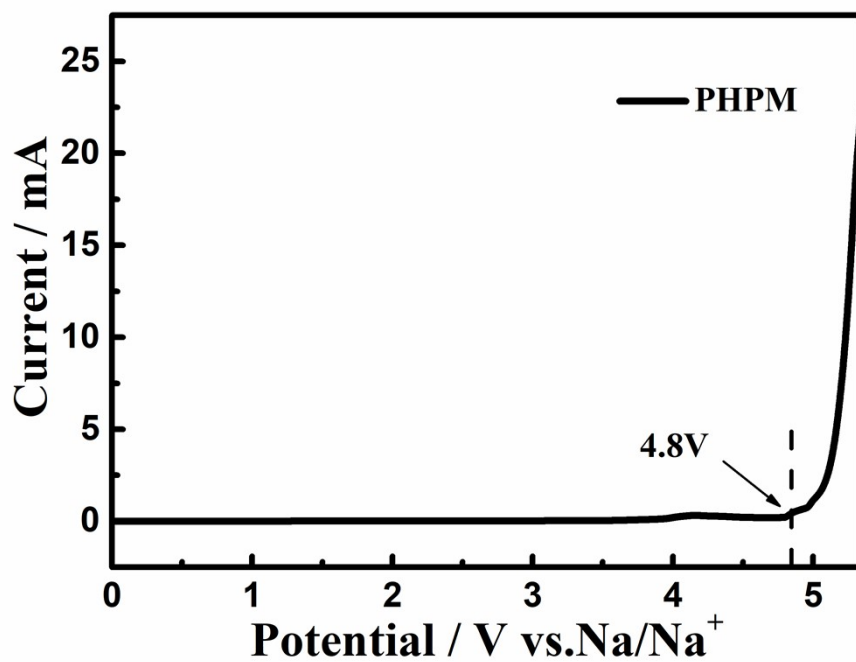

Figure S3. Linear sweep voltammetry curves from 0 V to 5.5 V with a sweep rate of  $1 \text{ mV S}^{-1}$  for cells with PHPM GPE sandwiched between stainless-steel and sodium electrodes.

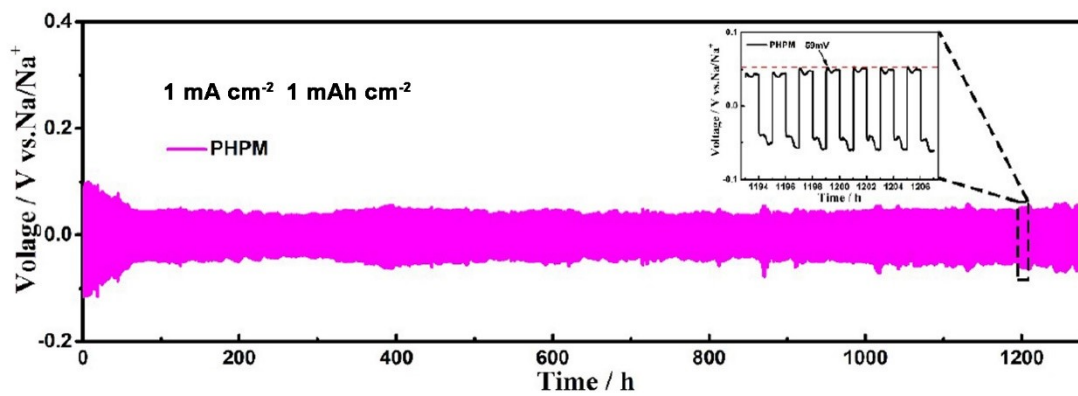

Figure S4. Voltage–time curves of symmetric Na-PHPM-Na cells at the current density of  $1.0 \text{ mA cm}^{-2}$ .

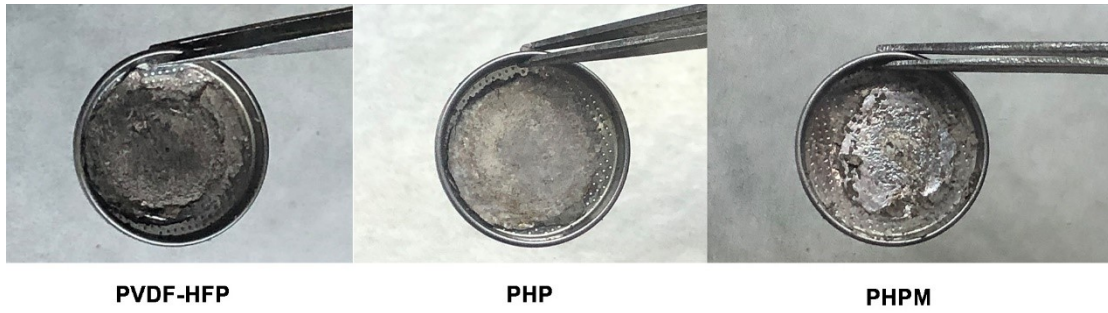

Figure S5. Photographs of Na-metal of Na-GPE-Na symmetric battery with PVDF-HFP, PHP and PHPM GPEs after Na plating/stripping for 1200 h.

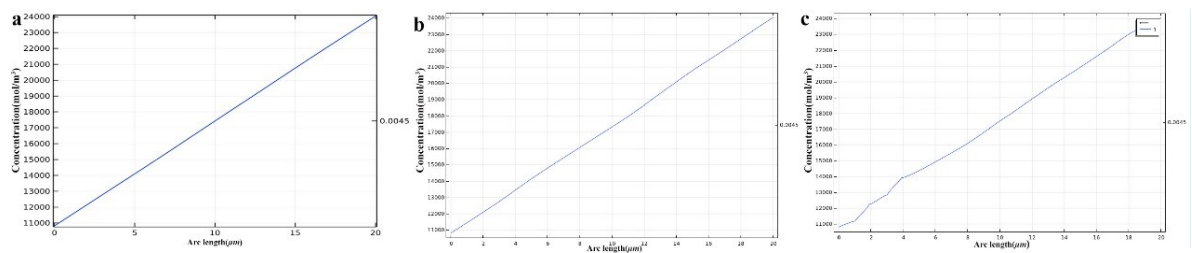

Figure S6. In-plane average concentration profile of different electrolytes and different arrangements:(a) PVDF-HFP, (b)PHP, (c)PHPM.

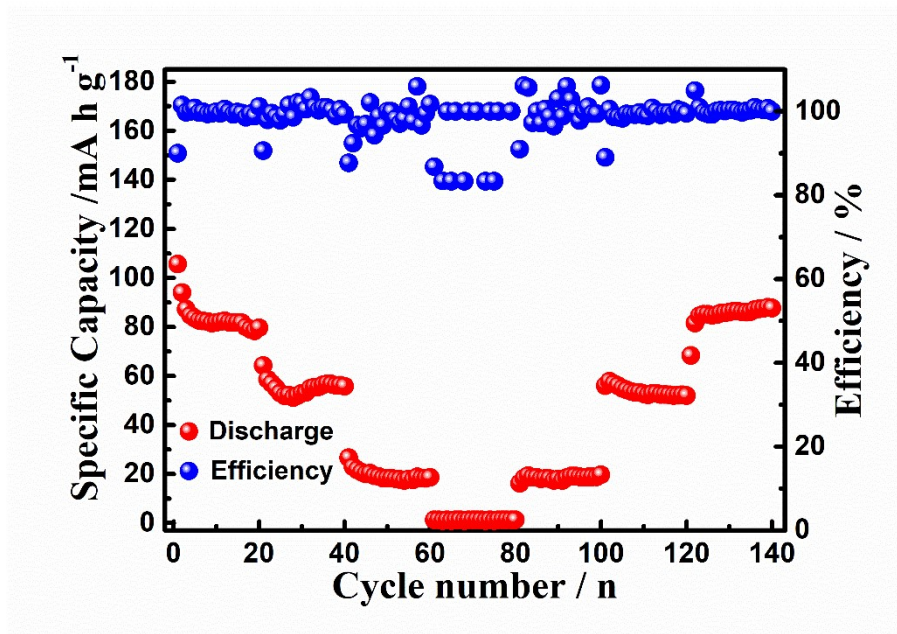

Figure S7. Rate capability at the current density of 1C, 2C, 3C, 4C with sodium titanium phosphate as anode and PHPM electrolyte as electrolyte.

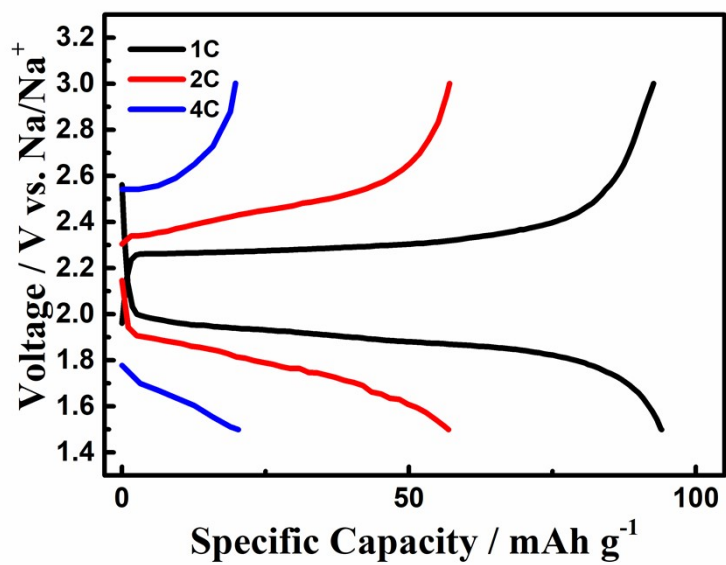

Figure S8. Charge/discharge curves with PH gel electrolyte at the current density of 1C, 2C, 4C.

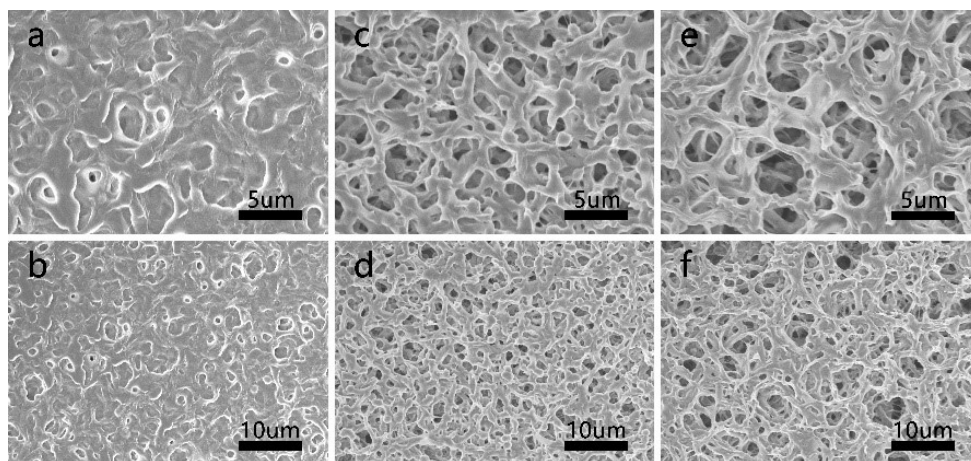

Figure S9. Enlarged view of microstructure of (a) and (b) PVDF; (c) and (d) PVDF-HFP; (e) and (f) PHPM.

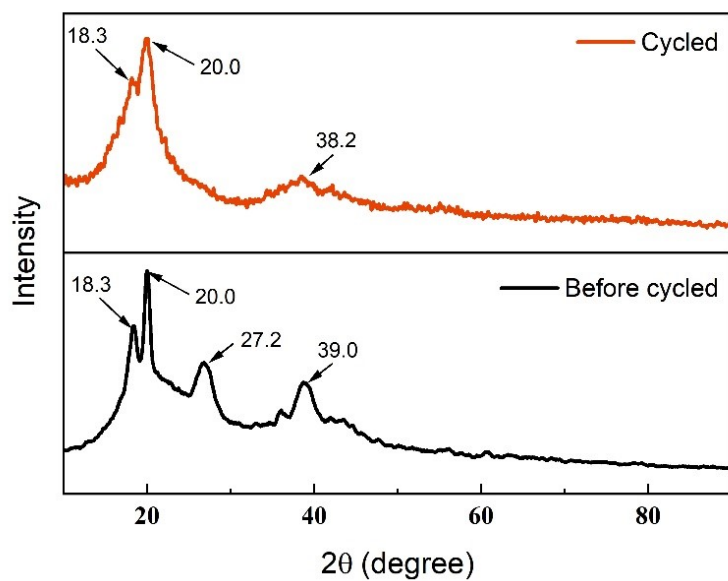

Figure. S10 The XRD pattern of PHPM after cycled in the Na//PHPM//Na battery.

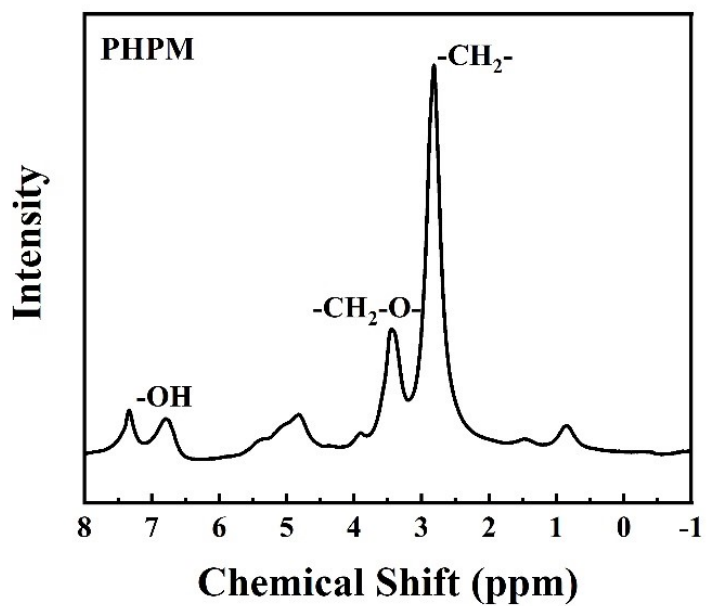

Figure. S11 H<sup>1</sup>-NMR of PHPM

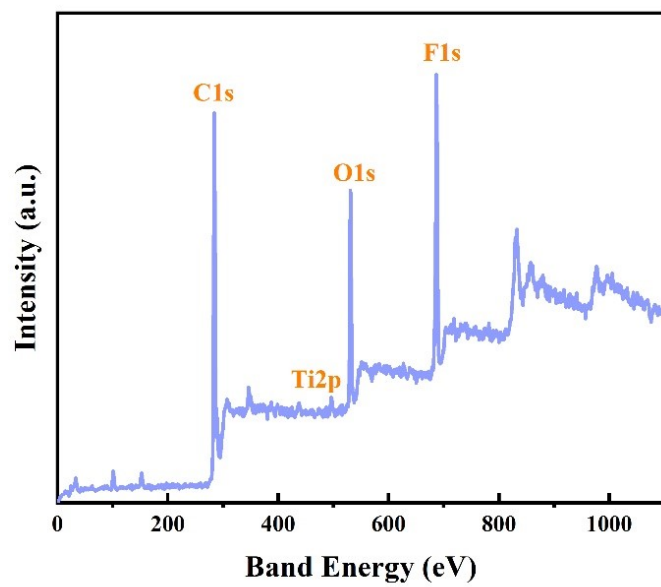

Figure. S12 XPS pattern of PHPM after cycled in symmetric battery.
